# Supplementary material for: Modelling convective cell lifecycles with a copula-based approach
Source: Copernicus journal article supplement (doi:10.5194/egusphere-2024-1540), 2024-05-30
Supplement: Supplementary file [file egusphere-2024-1540-AC2-supplement.pdf]

Table 1: Correlation analysis of convective cell properties' growth rate

| <i>Kendall's Tau</i> | $R_{I_{max},growth}$ | $R_{S_{maj},growth}$ | $R_{S_{min},growth}$ |
|----------------------|----------------------|----------------------|----------------------|
| $R_{I_{max},growth}$ | 1                    | 0.197                | 0.197                |
| $R_{S_{maj},growth}$ | 0.197                | 1                    | 0.466                |
| $R_{S_{min},growth}$ | 0.197                | 0.466                | 1                    |

Table 2: Correlation analysis of convective cell properties' decay rate

| <i>Kendall's Tau</i> | $R_{I_{max},decay}$ | $R_{S_{maj}, decay}$ | $R_{S_{min}, decay}$ |
|----------------------|---------------------|----------------------|----------------------|
| $R_{I_{max}, decay}$ | 1                   | 0.212                | 0.212                |
| $R_{S_{maj}, decay}$ | 0.212               | 1                    | 0.526                |
| $R_{S_{min}, decay}$ | 0.212               | 0.526                | 1                    |

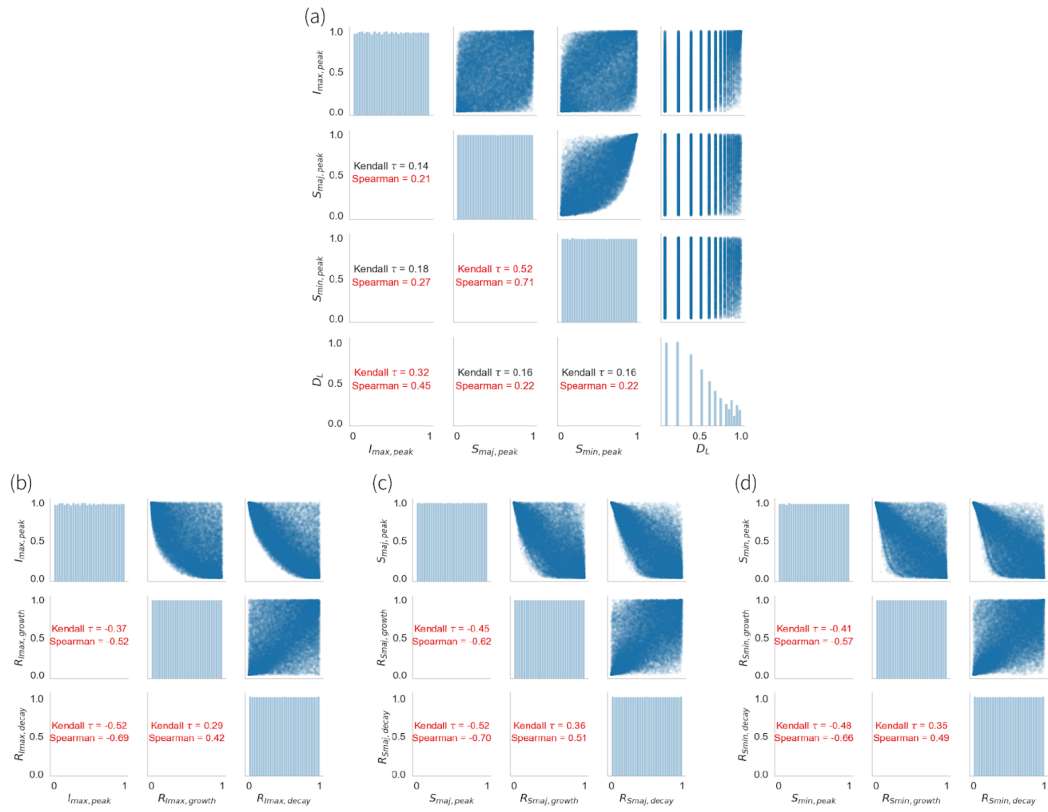

Figure 1. (corresponding to Figure 5 in the original manuscript) Correlation analyses amongst selected cell properties: (a) between peak properties; (b)-(d) between each peak property and the associated growth and decay rates.
